# Supplementary material for: Evaluation of a Global Vegetation Model using time series of satellite vegetation indices
Source: Copernicus journal article supplement (doi:10.5194/gmd-4-1103-2011), 2011-12-05
Supplement: Supplementary file 1 [file gmd-4-1103-2011-supplement.pdf]

## Supplementary Material

### Figure Captions

**Figure 1:** Fractional coverage of the 13 PFTs for the ERA-Interim simulation

**Figure 2:** Fractional coverage of the 13 PFTs for the CRU-NCEP simulation

### Tables

| PFT | Name                               | % ERA-I | % CRU-NCEP | % GlobCover |
|-----|------------------------------------|---------|------------|-------------|
| 1   | Bare soil                          | 32.3    | 18.5       | 26.6        |
| 2   | Tropical Broad-leaved Evergreen    | 10.1    | 9.6        | 6.0         |
| 3   | Tropical Broad-leaved Raingreen    | 12.6    | 6.0        | 9.0         |
| 4   | Temperate Needleleaf Evergreen     | 3.2     | 2.9        | 5.7         |
| 5   | Temperate Broad-leaved Evergreen   | 1.3     | 3.6        | 3.3         |
| 6   | Temperate Broad-leaved Summergreen | 4.5     | 3.8        | 5.4         |
| 7   | Boreal Needleleaf Evergreen        | 6.1     | 4.2        | 5.2         |
| 8   | Boreal Broad-leaved Summergreen    | 1.4     | 3.6        | 3.1         |
| 9   | Boreal Needleleaf Summergreen      | 1.7     | 1.4        | 4.1         |
| 10  | C3 Grass                           | 14.1    | 25.2       | 7.7         |
| 11  | C4 Grass                           | 0.1     | 10.0       | 11.2        |
| 12  | C3 Crops                           | 11.9    | 8.2        | 3.9         |
| 13  | C4 Crops                           | 0.6     | 2.8        | 8.8         |

**Table 1** describes the vegetation types used in ORCHIDEE and their repartition in terms of surface percentage, for both grid simulations, ERA-I and CRU-NCEP. We see that the CRU-NCEP vegetation map has a significant larger proportion of both C3 and C4 grasses. The PFT

distribution derived from the Globcover land cover (Poulter et al., 2011) is given to illustrate the large variability of the available PFT distributions.

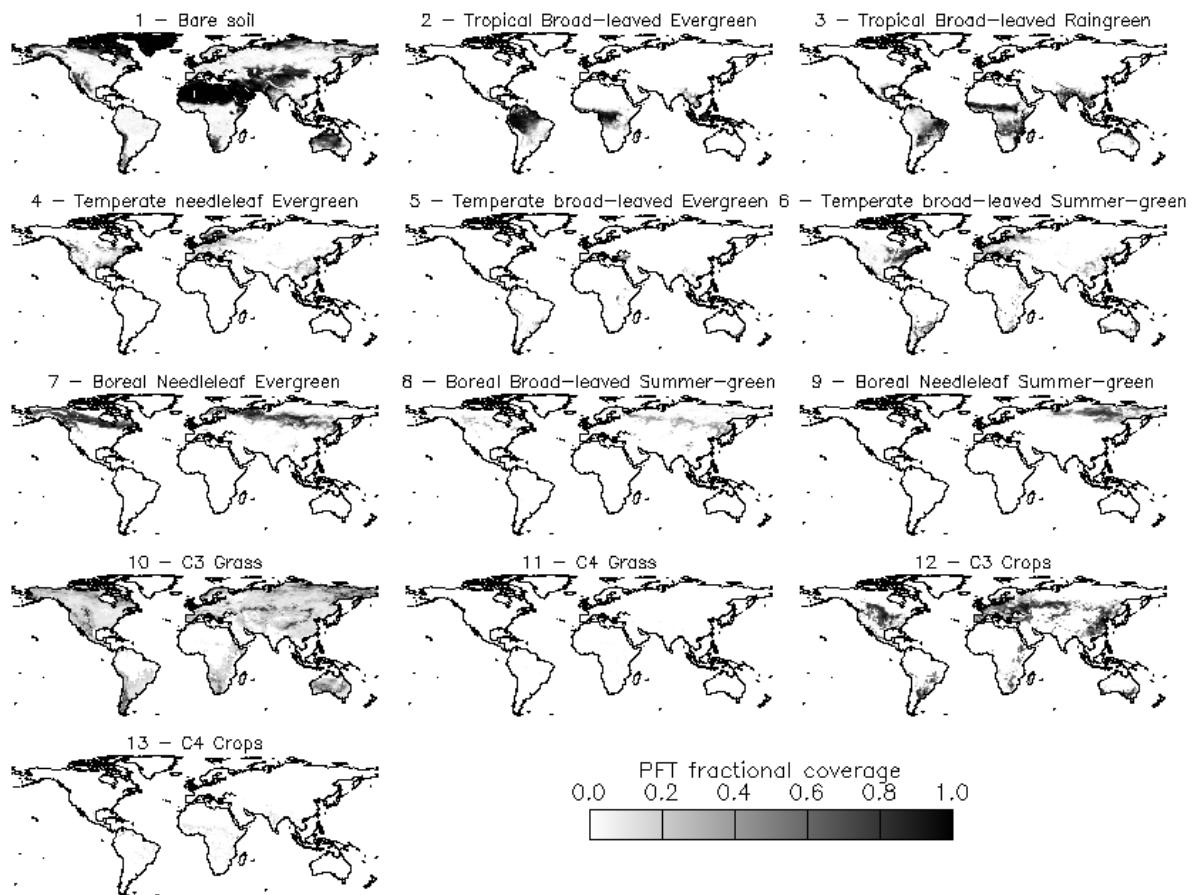

**Figure 1**

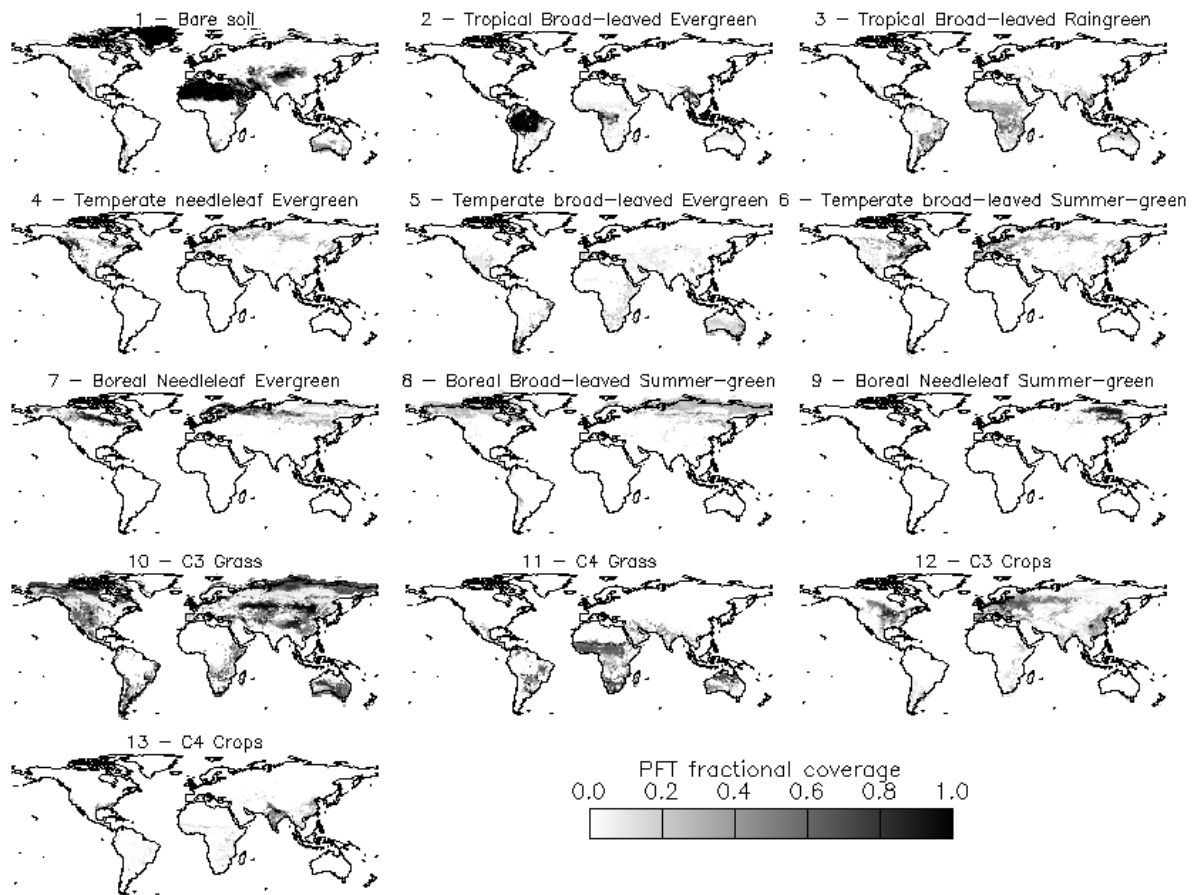

**Figure 2**
